# Supplementary material for: A novel albumin-binding macrocyclic Gd-HPDO3A complex bearing a deoxycholic acid residue: the role of the hydration state, water exchange and local dynamics in the observed relaxivity
Source: Royal Society of Chemistry journal article supplement (doi:10.1039/d4qi00894d), 2024-01-01
Supplement: d4qi00894d1.pdf [file d4qi00894d1.pdf]

## Supporting information

### **A novel Albumin-binding macrocyclic Gd-HPDO3A complex bearing a deoxycholic acid residue. The role of hydration state, water exchange and local dynamics on the observed relaxivity**

Ferdeze Hasallari,<sup>a,b</sup> Carla Carrera,<sup>a</sup> Eleonora Cavallari,<sup>a</sup> Eliana Gianolio<sup>a\*</sup> and Silvio Aime

- a. Department of Molecular Biotechnology and Health Sciences, Molecular Imaging Centre, University of Torino Via Nizza 52, 10126 Torino, Italy
- b. DiSIT - Department of Science and Technological Innovation, Università del Piemonte Orientale "A. Avogadro", Viale T. Michel 11, 15121, Alessandria, Italy
- c. IRCCS SDN SynLab, Via Gianturco 113, Naples, Italy.

#### **Corresponding author:**

Prof. Eliana Gianolio

Department of Molecular Biotechnology and Health Sciences, Molecular Imaging Centre, University of Torino Via Nizza 52, 10126 Torino, Italy

e-mail: [eliana.gianolio@unito.it](mailto:eliana.gianolio@unito.it)

phone: +390116706475

## Fitting models

### -<sup>17</sup>O water transversal relaxation rate vs temperature

The exchange lifetime ( $\tau_M$ ) of the metal bound water molecule in a paramagnetic chelate may be accurately assessed by measuring the temperature dependence of the paramagnetic contribution ( $R_{2p}^O$ ) to the observed water <sup>17</sup>O transverse relaxation rate ( $R_{2obs}^O$ ).

$R_{2p}^O$  is related to  $\tau_M$  through the values of  $\Delta\omega_M^O$  (i.e. the <sup>17</sup>O chemical shift difference between coordinated and bulk water molecule) and  $R_{2M}^O$  (which represents the transverse relaxation rate of the coordinated water oxygen) according to the Swift and Connick equation (eq. 2 and 3).<sup>1</sup> In the presence of two isomers/species (namely A and B) characterized by different water exchange dynamics, two contributions to  $R_{2p}^O$  can be defined:

$$R_{2p}^O = R_{2obs}^O - R_{2dia}^O = R_{2pA}^O + R_{2pB}^O \quad (1)$$

$$R_{2pA}^O = \frac{qC_A}{55.6} \tau_{MA}^{-1} \frac{R_{2MA}^O{}^2 + \tau_{MA}^{-1} R_{2MA}^O + \Delta\omega_{MA}^O{}^2}{(R_{2MA}^O + \tau_{MA}^{-1}) + \Delta\omega_{MA}^O{}^2} \quad (2)$$

$$R_{2pB}^O = \frac{qC_B}{55.6} \tau_{MB}^{-1} \frac{R_{2MB}^O{}^2 + \tau_{MB}^{-1} R_{2MB}^O + \Delta\omega_{MB}^O{}^2}{(R_{2MB}^O + \tau_{MB}^{-1}) + \Delta\omega_{MB}^O{}^2} \quad (3)$$

where  $R_{2dia}^O$  is the contribution to  $R_{2obs}^O$  measured for a solution lacking the Gd(III) complex, q is the number of inner sphere water molecules,  $C_A$  and  $C_B$  are the concentrations of A and B isomers, respectively (with  $C_A + C_B = C_{tot}$ ),  $\tau_{MA}$  and  $\tau_{MB}$  are the exchange lifetimes of coordinated water molecule in A and B.

For relatively small-sized Gd(III) chelates,  $R_{2M}^O$  is essentially dominated by the electron-nucleus scalar interaction, thus for A and B we have:

$$R_{2MA}^O = \frac{1}{3} \left( \frac{A}{h} \right)^2 S(S+1) \left( \tau_{E1A} + \frac{\tau_{E2A}}{1 + \omega_s^2 \tau_{E2A}^2} \right) \quad (4)$$

$$R_{2MB}^O = \frac{1}{3} \left( \frac{A}{h} \right)^2 S(S+1) \left( \tau_{E1B} + \frac{\tau_{E2B}}{1 + \omega_s^2 \tau_{E2B}^2} \right) \quad (5)$$

Where  $S$  is the electronic spin quantum number (7/2 for Gd(III)),  $\frac{A}{h}$  is the Gd- $^{17}\text{O}$  scalar coupling constant (we used a value of  $-3.8 \times 10^6 \text{ rad s}^{-1}$ )<sup>2</sup> and  $\tau_{EiA}$  and  $\tau_{EiB}$  (with  $i=1, 2$ ) represent the correlation times modulating the scalar interaction. This modulation may occur either through the longitudinal and transverse electronic relaxation times ( $T_{1E}$  and  $T_{2E}$ ) or the mean residence lifetime  $\tau_M$  of the water molecule at the paramagnetic site, i.e.

$$\tau_{EiA}^{-1} = T_{iEA}^{-1} + \tau_{MA}^{-1} \quad (6)$$

$$\tau_{EiB}^{-1} = T_{iEB}^{-1} + \tau_{MB}^{-1} \quad (7)$$

The temperature dependence of  $R_{2M}^O$  is then expressed by the temperature effect on  $\tau_M$  and  $\Delta\omega_M^O$  according to the following equations:

$$\Delta\omega_{MA}^O = \frac{g_e \mu_B S(S+1) B_0}{3k_B T} \frac{A}{h} \quad (8)$$

$$\Delta\omega_{MB}^O = \frac{g_e \mu_B S(S+1) B_0}{3k_B T} \frac{A}{h} \quad (9)$$

where  $B_0$  is the magnetic field strength,  $k_B$  is the Boltzmann constant,  $g_e$  is the g factor for the free electron,  $\mu_B$  is the Bohr magneton.

$$(\tau_j)_T = (\tau_j)^{0.98,15} \exp \left[ \frac{E_j}{R} \left( \frac{1}{T} - \frac{1}{298.15} \right) \right] \quad (10)$$

where  $j$  refers to the two different dynamic processes involved ( $j = v, M$ ).

### ***<sup>1</sup>H water longitudinal relaxation rate as a function of magnetic field***

The relaxivity of a Gd(III) complex results from contributions arising mainly from water molecules in the inner- and the outer-coordination spheres:

$$r_1 = r_1^{His} + r_1^{Hos} \quad (11)$$

$r_1^{His}$  refers to the contribution from the exchange of the water protons in the first coordination sphere of the paramagnetic metal ion:

$$r_1^{His} = \frac{q[GdL]}{55.56 \times (T_{1M}^H + \tau_M)} \quad (12)$$

where  $q$  is the inner sphere hydration number,  $[GdL]$  is the molar concentration of the Gd-complex,  $T_{1M}^H$  is the longitudinal relaxation time of the inner-sphere water protons and  $\tau_M$  is their residence lifetime. The classical Solomon-Bloembergen theory<sup>3,4</sup> provides the magnetic field dependence of  $T_{1M}^H$  and was applied to fit NMRD profiles of **Gd-HIBDO3A-DCA**, **Gd-HPDO3A-DCA** and **Gd-HIBDO3A** in PBS:

$$\frac{1}{T_{1M}^H} = \frac{2}{15} \frac{\gamma_H^2 g_e^2 \mu_B^2 S(S+1)}{r_H^6} \left[ \frac{3\tau_{c1}}{1 + \omega_H^2 \tau_{c1}^2} + \frac{7\tau_{c2}}{1 + \omega_S^2 \tau_{c2}^2} \right] \quad (13)$$

where  $S$  is the electron spin quantum number (7/2 for Gd(III)),  $\gamma_H$  is the proton nuclear gyromagnetic ratio,  $\mu_B$  is the Bohr magneton,  $g_e$  is the Landè factor for the free electron,  $r_H$  is the distance between the metal ion and the inner-sphere water protons;  $\omega_H$  and  $\omega_S$  are the proton and electron Larmor frequencies ( $\omega_S = 658.21 \times \omega_H$ ), respectively and  $\tau_{ci}$  ( $i=1,2$ ) are the correlation times related to the modulation of the dipolar electron-proton coupling. Such an interaction may be modulated by the reorientation of the paramagnetic species,  $\tau_R$ , by the residence lifetime,  $\tau_M$  and by the electronic relaxation times,  $T_{iE}$ .

$$\tau_{ci}^{-1} = \tau_R^{-1} + \tau_M^{-1} + T_{iE}^{-1} \quad (14)$$

Experimental data relative of the NMRD profile of **Gd-HIBDO3A-DCA in human serum** were fitted with the Solomon-Bloembergen-Morgan equations modified according to the Lipari-Szabo model-free approach.<sup>5</sup> This model considers both a local internal rotation, characterized by a correlation time  $\tau_{RL}$ , and a global motion described by  $\tau_{RG}$ . The correlation between these two motions is quantified by the order parameter  $K^2$ , which varies in the range 0-1, where a value of zero indicates complete independence between the motions, and a value of 1 suggests immobilization in the absence of local fluctuations. Equations 13-14 were modified as follows:

$$\frac{1}{T_{1M}^H} = \frac{2}{15} \frac{\gamma_H^2 g_e^2 \mu_B^2 S(S+1)}{r_H^6} \left[ \frac{3K^2 \tau_{c1g}}{1 + \omega_H^2 \tau_{c1g}^2} + \frac{3(1-K^2) \tau_{c1}}{1 + \omega_H^2 \tau_{c1}^2} + \frac{7K^2 \tau_{c2g}}{1 + \omega_S^2 \tau_{c2g}^2} + \frac{7(1-K^2) \tau_{c2}}{1 + \omega_S^2 \tau_{c2}^2} \right] \quad (15)$$

$$\tau_R^{-1} = \tau_{RG}^{-1} + \tau_{RL}^{-1} \quad (16)$$

$$\tau_{ci}^{-1} = \tau_R^{-1} + \tau_M^{-1} + T_{iE}^{-1} \quad (17)$$

$$\tau_{cig}^{-1} = \tau_{RG}^{-1} + \tau_M^{-1} + T_{iE}^{-1} \quad (18)$$

Analogously to the nuclear relaxation time, the electronic relaxation times depend on the magnetic field strength. For Gd(III) complexes  $T_{iE}$  is determined by the modulation of the transient zero field splitting (ZFS) of the electronic spin states caused by the dynamic distortions of the ligand field and, according to the Blombergen-Morgan theory, their magnetic field dependence is given by the following equations:

$$T_{1E}^{-1} = \frac{1}{25} \Delta^2 \tau_v [4S(S+1) - 3] \left( \frac{1}{1 + \omega_S^2 \tau_v^2} + \frac{4}{1 + 4\omega_S^2 \tau_v^2} \right) \quad (19)$$

$$T_{2E}^{-1} = \frac{1}{50} \Delta^2 \tau_v [4S(S+1) - 3] \left( 3 + \frac{5}{1 + \omega_S^2 \tau_v^2} + \frac{2}{1 + 4\omega_S^2 \tau_v^2} \right) \quad (20)$$

where  $\Delta^2$  is the square of the transient ZFS energy and  $\tau_v$  is the correlation time related to its modulation.

The outer sphere term,  $r_1^{Hos}$ , describes the contribution from water molecules which diffuses around the paramagnetic complex and, according to the model developed by Hwang and Freed,<sup>3</sup> may be related to the minimum distance between the metal and the outer-sphere water protons,  $a$ , the relative solute-solvent diffusion coefficient,  $D$ , and, again, the electronic relaxation times,  $T_{iE}$  :

$$r_1^{Hos} = C^{os} \left( \frac{1}{aD} \right) [7J(\omega_s) + 3J(\omega_H)] \quad (21)$$

where  $C^{os}$  is a constant ( $5.8 \cdot 10^{-13} \text{ s}^2 \text{ M}^{-1}$ ) and the dependence on the electronic relaxation times is expressed in the non-Lorentzian spectral density functions  $J(\omega_i)$ .

### ***-Proton Relaxation Enhancement (PRE) for the determination of binding affinity to macromolecules***

The binding parameters involved in the non-covalent interaction between a paramagnetic chelate and a macromolecular system may be conveniently performed through the well-consolidated PRE technique.

When a paramagnetic complex interacts with a macromolecule the following equilibrium is established:

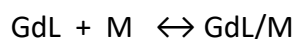

The affinity constant  $K_A$  is the equilibrium constant and is given by the equation:

$$K_A = \frac{[\text{GdL/M}]}{[\text{GdL}][n\text{M}]} \quad (22)$$

in which  $[n\text{M}]$  indicates the concentration of the equivalent and independent binding sites and  $\text{GdL}$  represents the  $\text{Gd}^{\text{III}}$  chelate.

The measured longitudinal proton relaxation rate ( $R_{1\text{obs}}$ ) is given by the sum of the contributions arising from the unbound and the bound species as well as the diamagnetic contribution of the host ( $R_{1\text{M}}$ ):

$$R_{1obs} = (r_1[GdL] + r_1^b[GdL / M])1000 + R_{1M} \quad (23)$$

Where  $r_1$  and  $r_1^b$  are the millimolar relaxivity values of the unbound and bound GdL respectively.

Combination of the equations 22 and 23, allows to correlate the measured  $R_{1obs}$  to the binding parameters  $K_A$  and  $n$ , as follows:

$$R_{1obs} = \frac{(K_A GdL_T + nK_A M_T + 1) - \sqrt{(K_A GdL_T + nK_A M_T + 1)^2 - 4K_A^2 GdL_T nM_T}}{2K_A} - (r_1^b - r_1 + r_1 GdL_T)1000 + R_{1M} \quad (24)$$

Where  $GdL_T$  and  $M_T$  are the total molar concentrations of the **GdL** and the host macromolecule, respectively.

## References

- 1) T. J. Swift, R. E. J. Connick, *J. Chem. Phys.* 1962, 37, 307
- 2) D. H. Powell, O. M. Ni Dhubhghaill, D. Pubanz, L. Helm, Y. S. Lebedev, W. Schlaepfer, A. E. Merbach, *J. Am. Chem. Soc.* 1996, 118, 93332 9346.
- 3) L. Banci, I. Bertini, C. Luchinat, *Nuclear and Electronic Relaxation*, VCH, Weinheim, 1991, p. 91.
- 4) N. Bloembergen, L. O. Morgan, *J. Chem. Phys.* 1961, 34, 8422 850.
- 5) Ref 45 of the main text

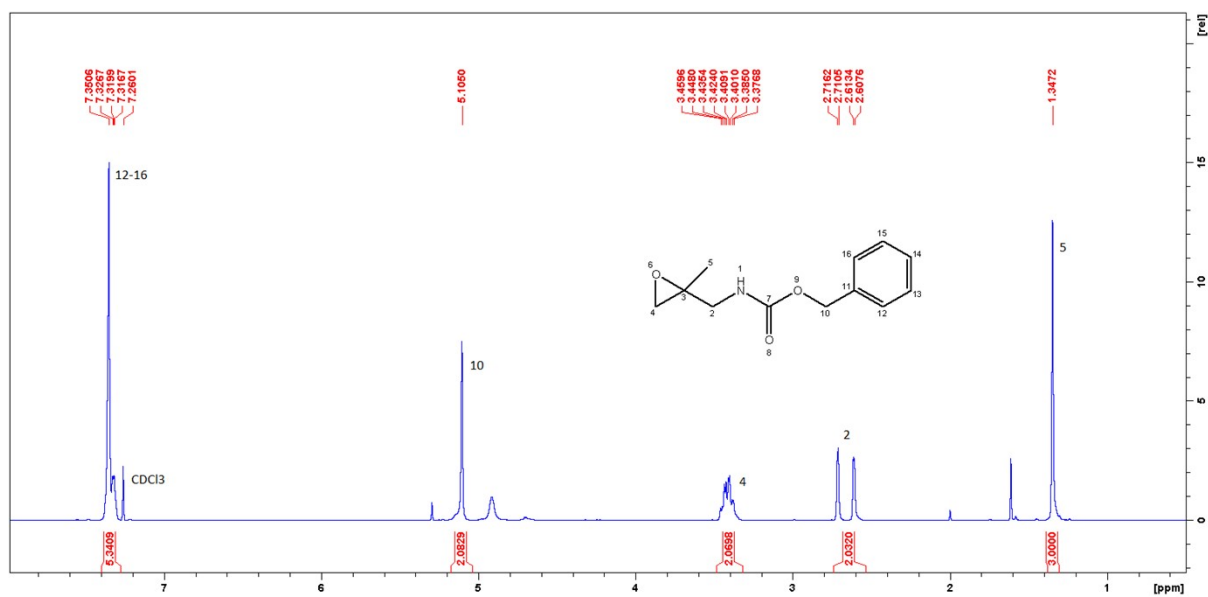

**Figure S1:** <sup>1</sup>H-NMR spectrum of product **2** in CDCl<sub>3</sub> at 600 MHz and 298 K.

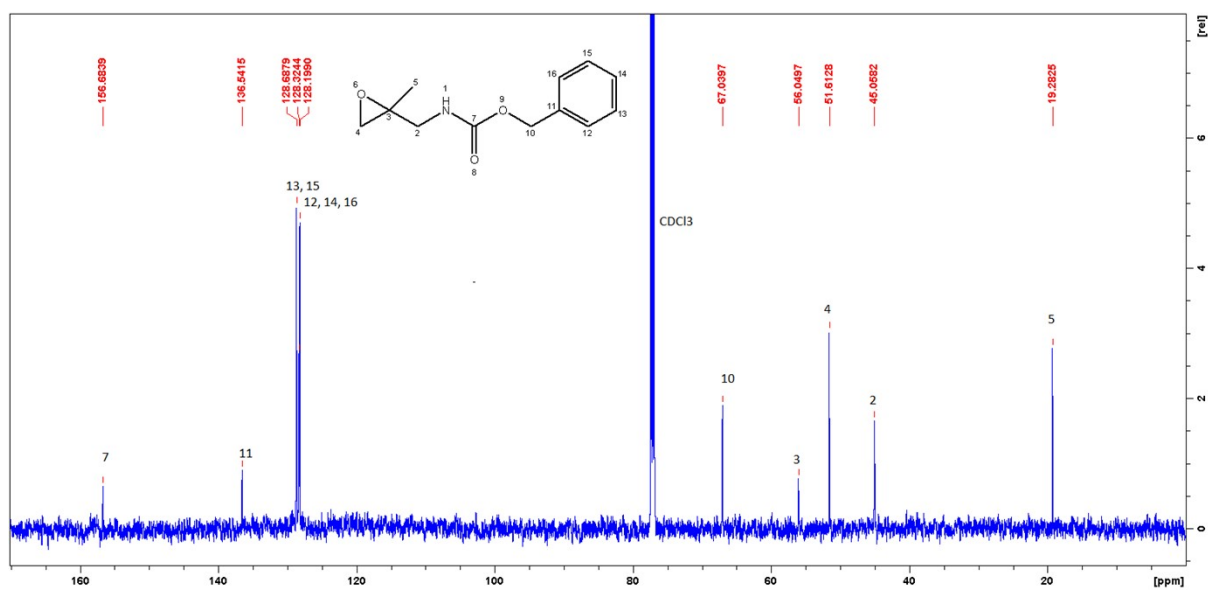

**Figure S2:** <sup>13</sup>C-NMR spectrum of product **2** in CDCl<sub>3</sub> at 600 MHz and 298 K.



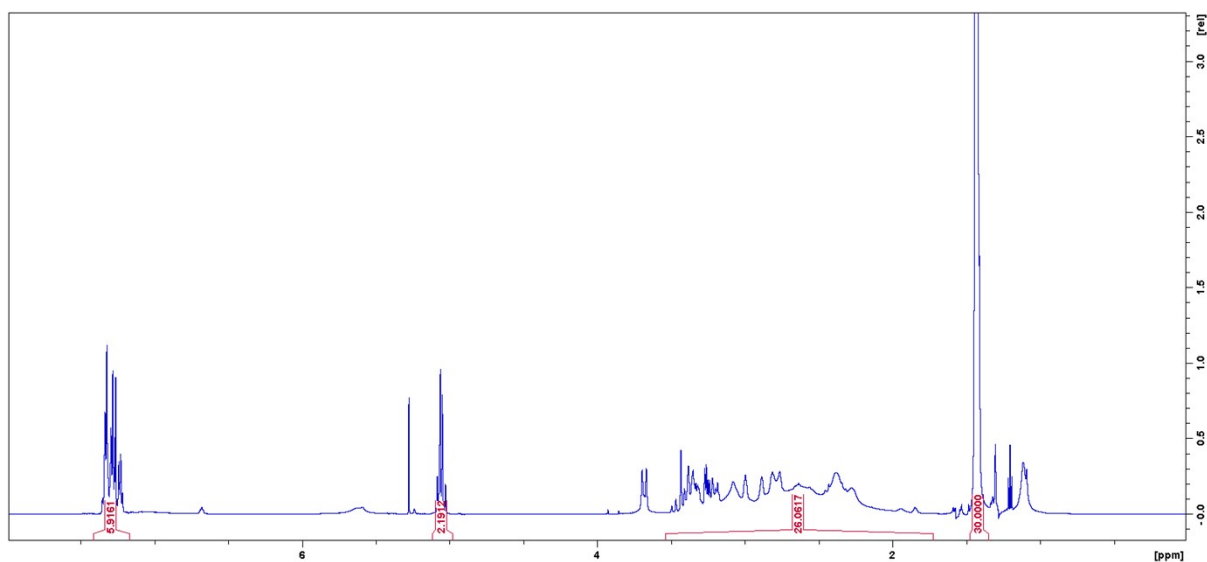

**Figure S3:**  $^1\text{H}$ -NMR spectrum of product **3** in  $\text{CDCl}_3$  at 600 MHz and 298 K.

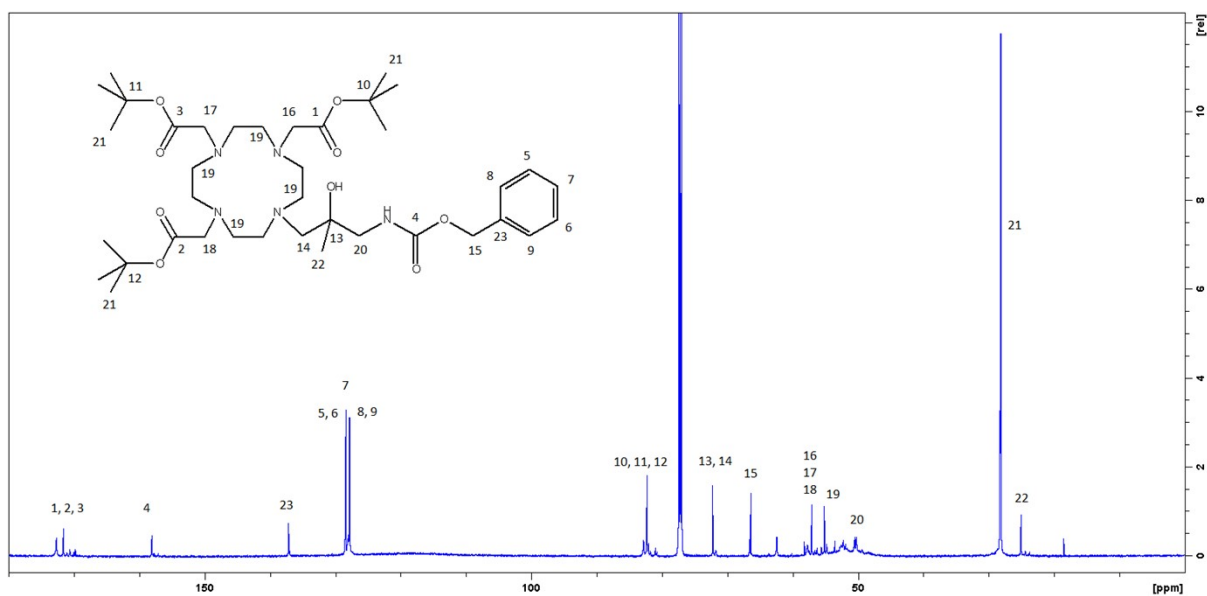

**Figure S4:**  $^{13}\text{C}$ -NMR spectrum of product **3** in  $\text{CDCl}_3$  at 600 MHz and 298 K.

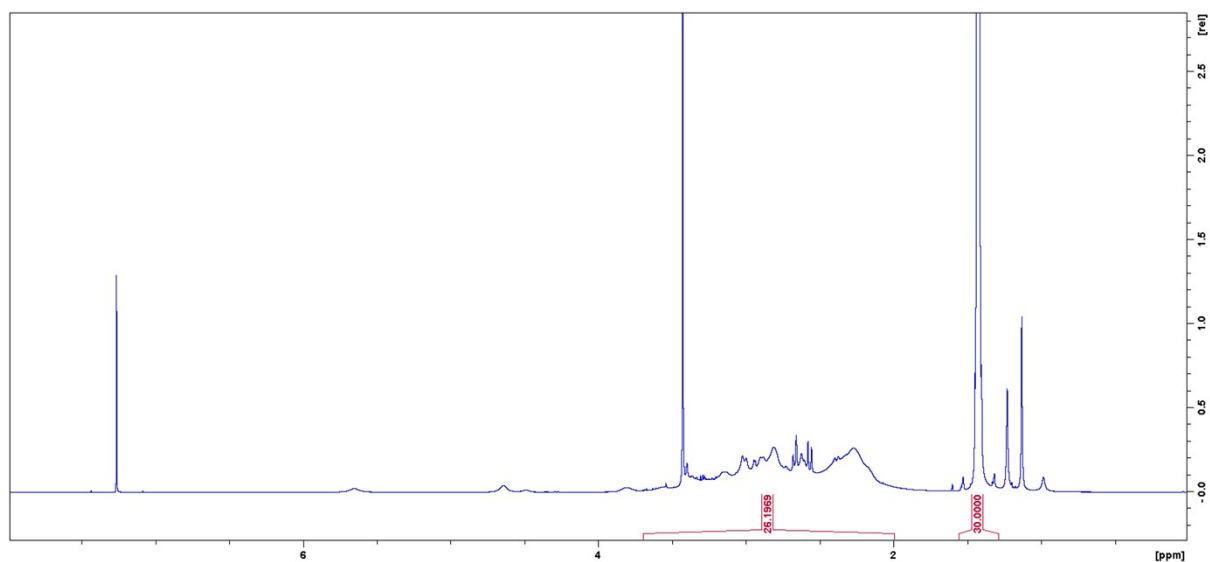

**Figure S5:**  $^1\text{H}$ -NMR spectrum of product **4** in  $\text{CDCl}_3$  at 600 MHz and 298 K.

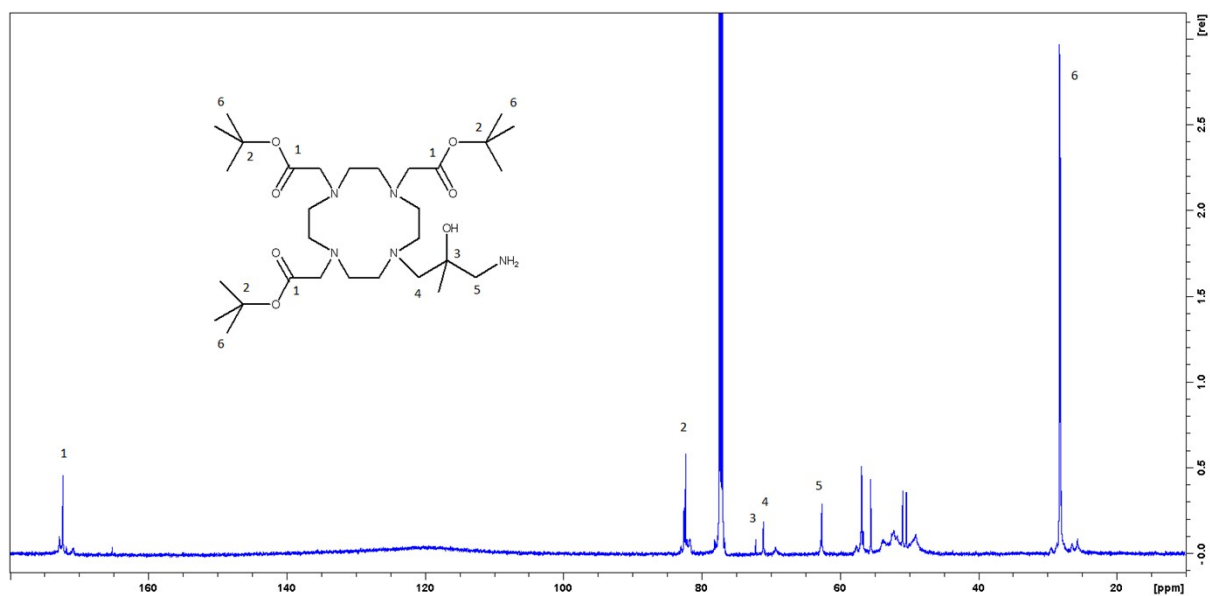

**Figure S6:**  $^{13}\text{C}$ -NMR spectrum of product **4** in  $\text{CDCl}_3$  at 600 MHz and 298 K.

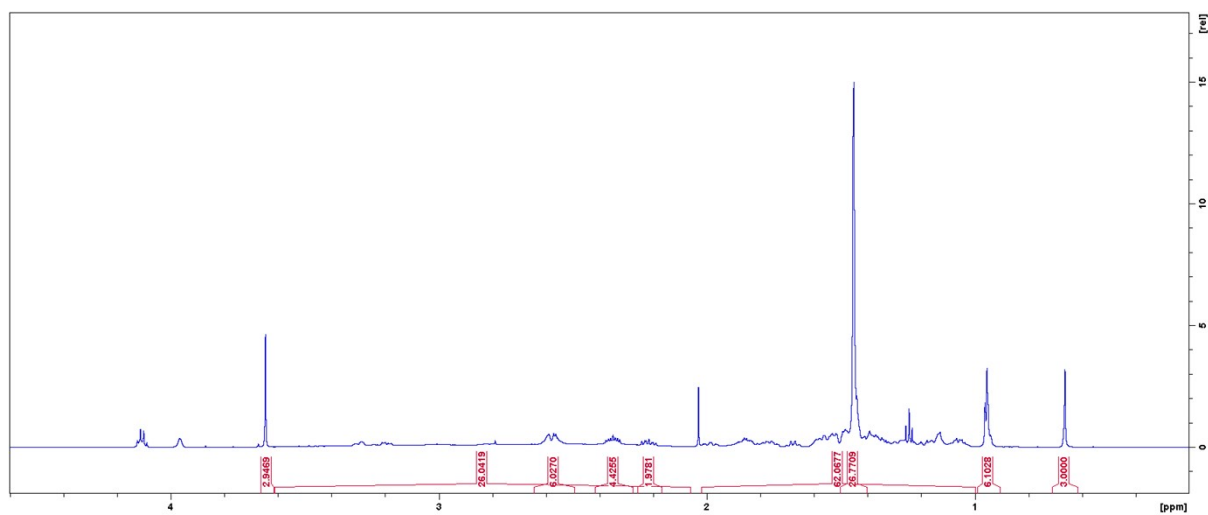

**Figure S7:** <sup>1</sup>H-NMR spectrum of product **5** in CDCl<sub>3</sub> at 600 MHz and 298 K.

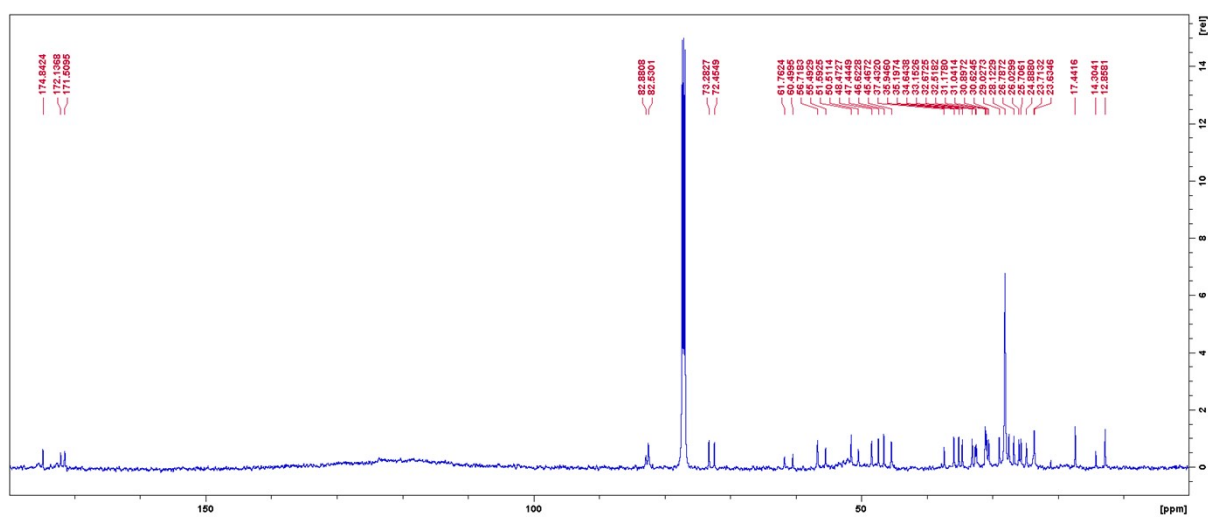

**Figure S8:** <sup>13</sup>C-NMR spectrum of product **5** in CDCl<sub>3</sub> at 600 MHz and 298 K.

a)

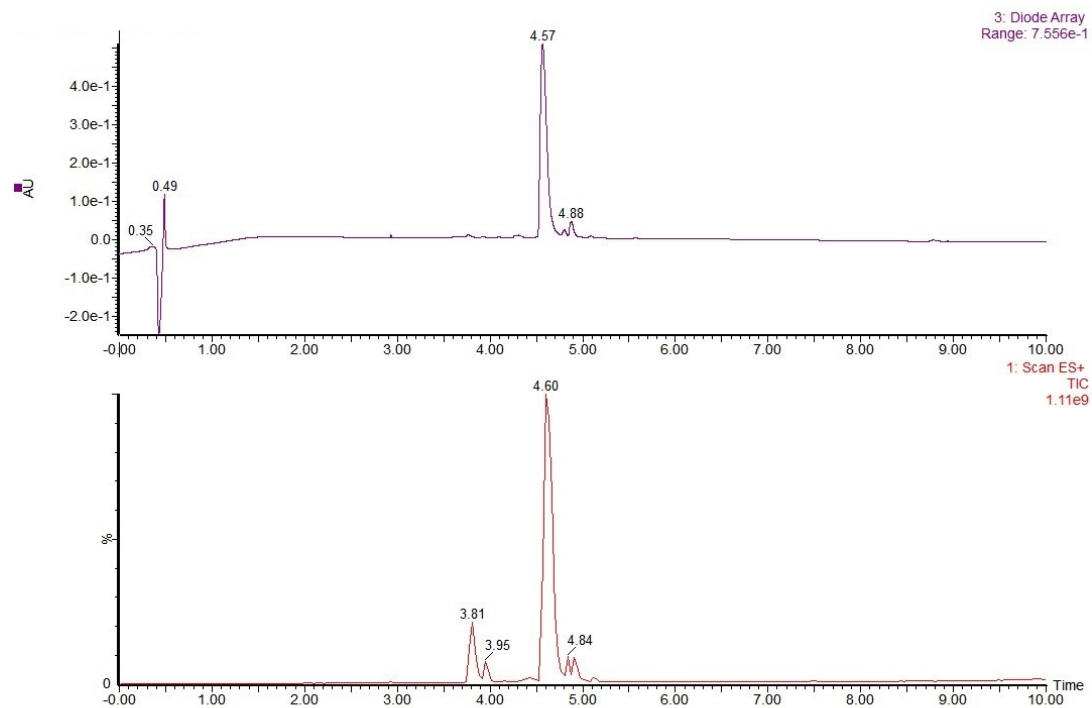

b)

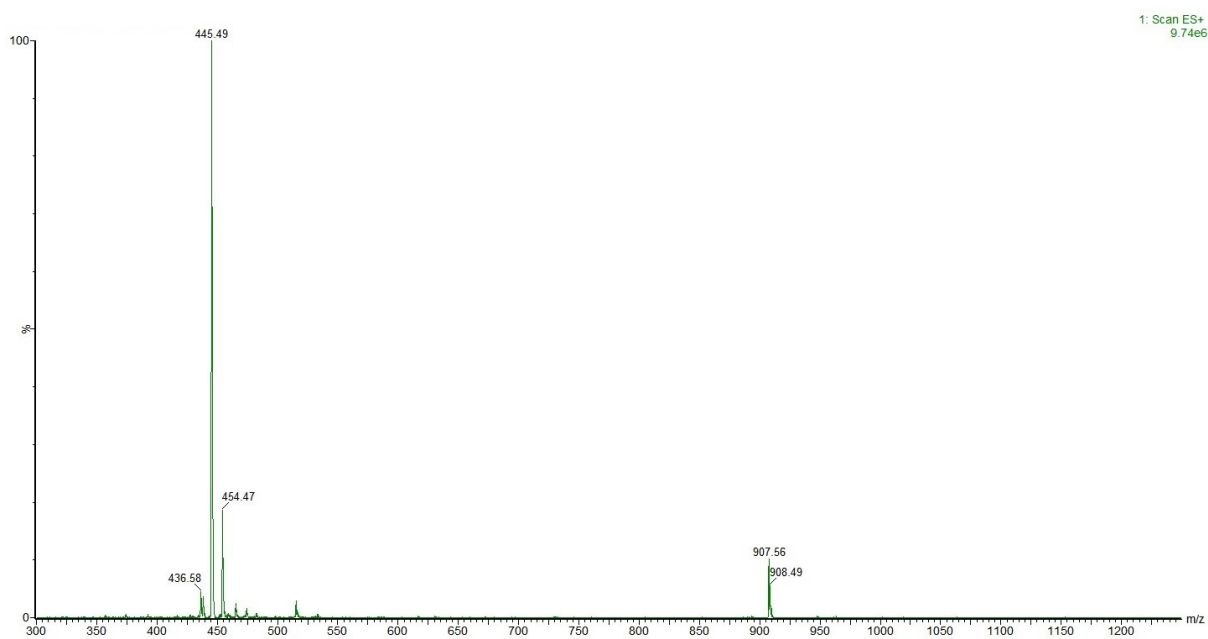

**Figure S9:** a) Chromatogram (210 nm and ESI+), purity >91% and b) Mass spectrum in ESI+ of peak at 4.6 min of product **6**.

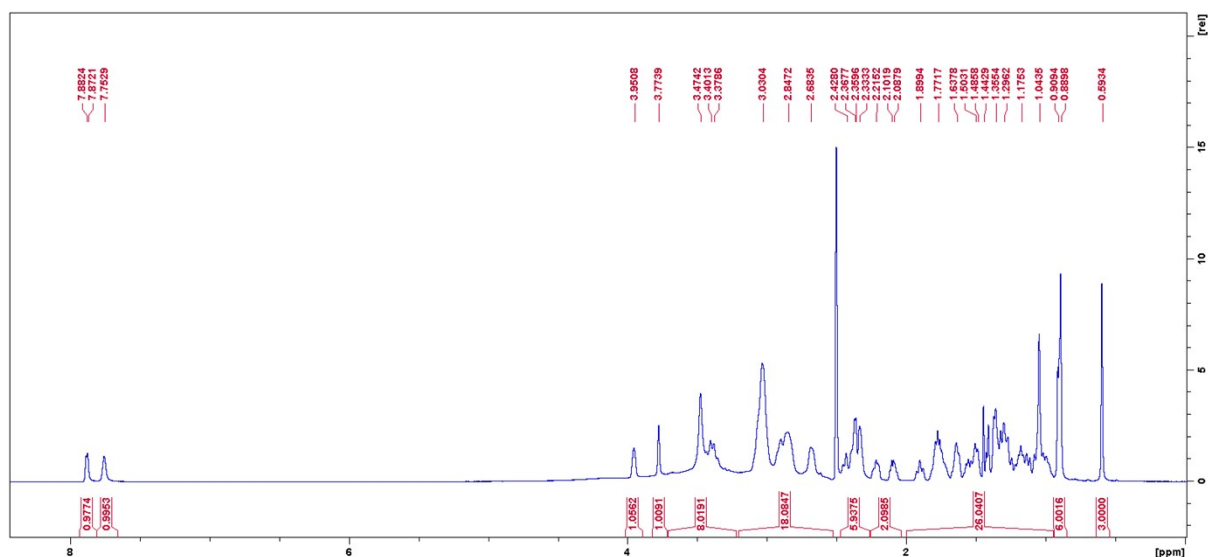

**Figure S10:**  $^1\text{H}$ -NMR spectrum of product **6** in DMSO  $d_6$  at 600 MHz and 298 K.

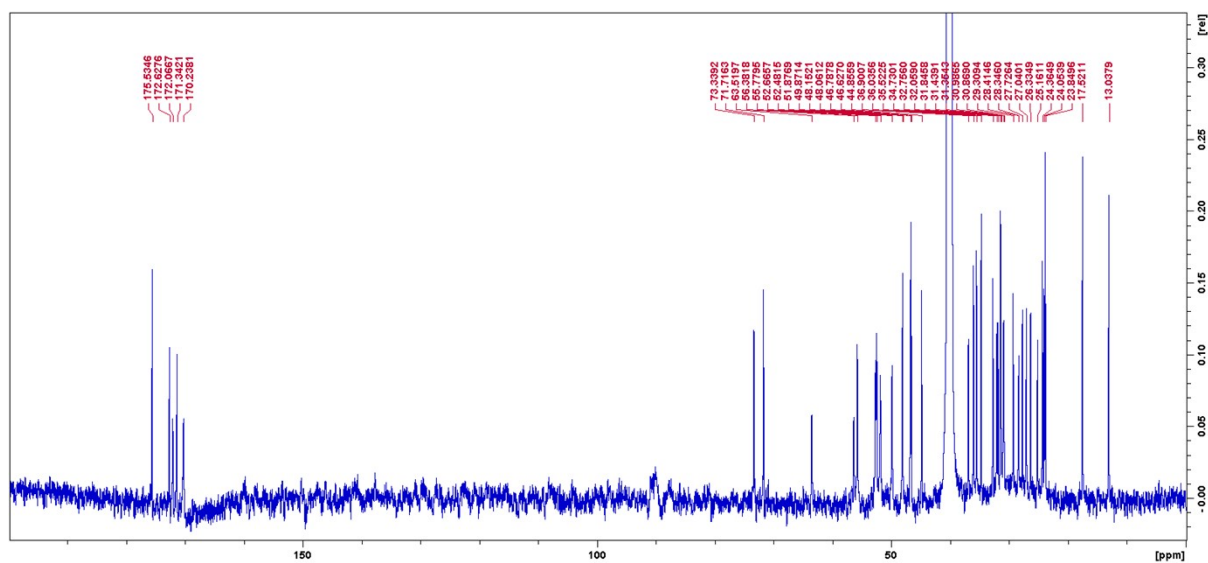

**Figure S11:**  $^{13}\text{C}$ -NMR spectrum of product **6** in DMSO  $d_6$  at 600 MHz and 298 K.

a)

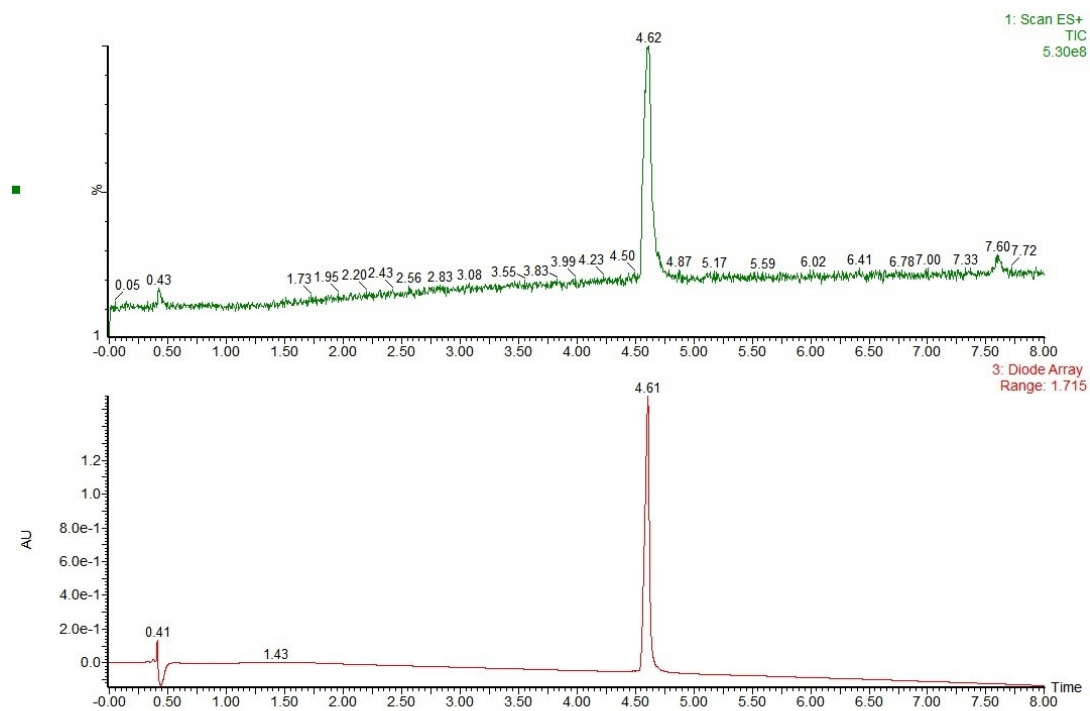

b)

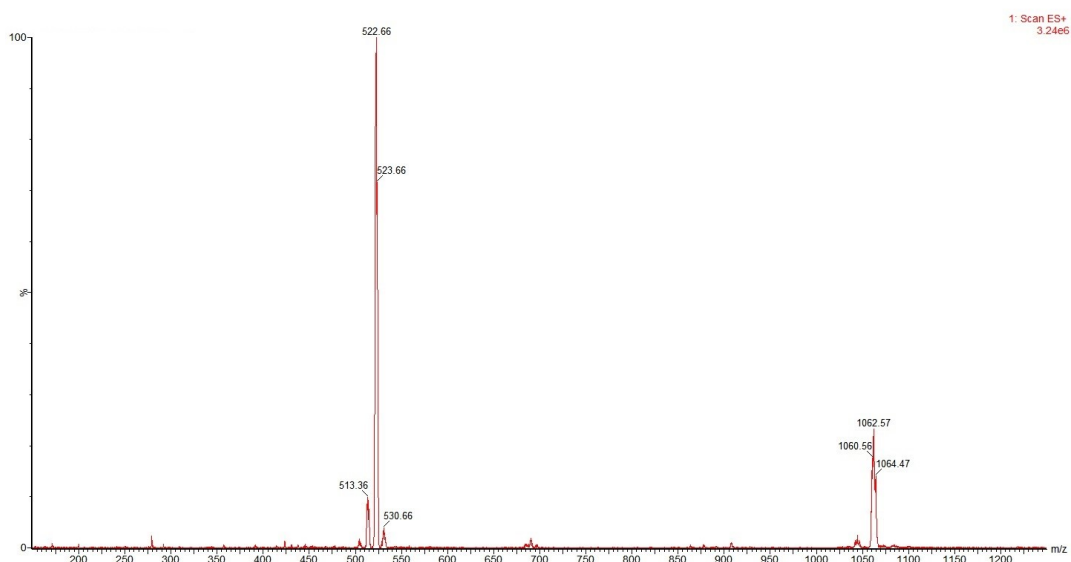

**Figure S12:** a) Chromatogram (210 nm and ESI+), purity >99% and b) Mass spectrum in ESI+ of peak at 4.61 min of the Gd complex.

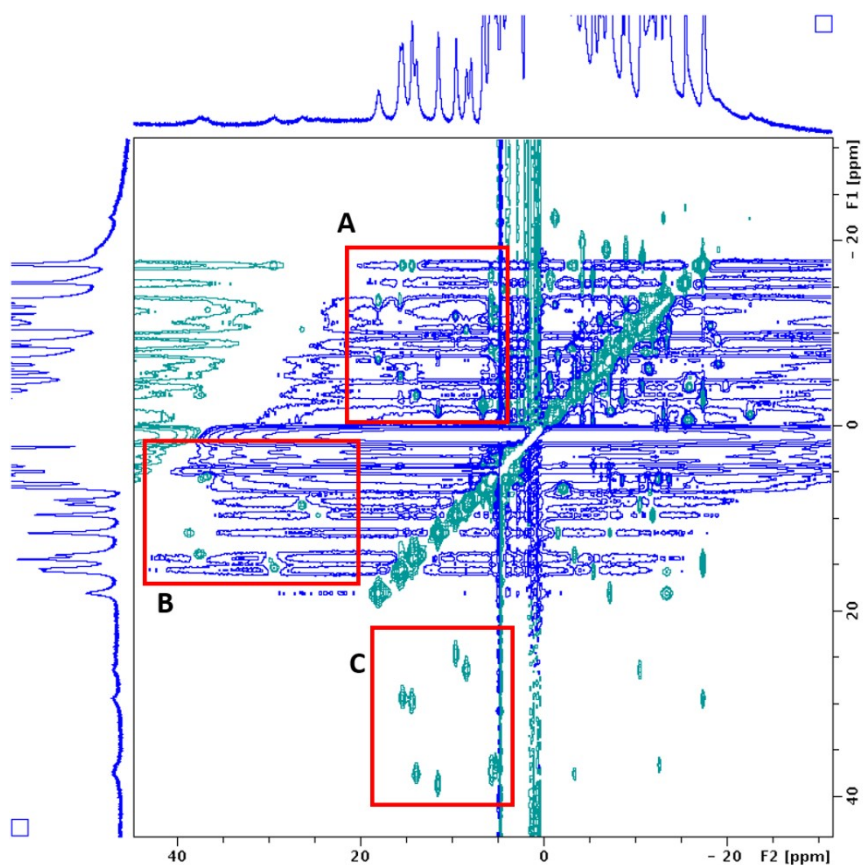

**Figure S13:** 2D-EXSY  $^1\text{H}$  NMR of Eu-HIBDO3A-DCA (20 mM) in  $\text{D}_2\text{O}$  at pH 7.4, 298 K and 14.1 T with a mixing time of 5 ms. Box (A) indicates ring inversion and boxes (B) and (C) indicate arm rotation between SAP and TSAP isomers.

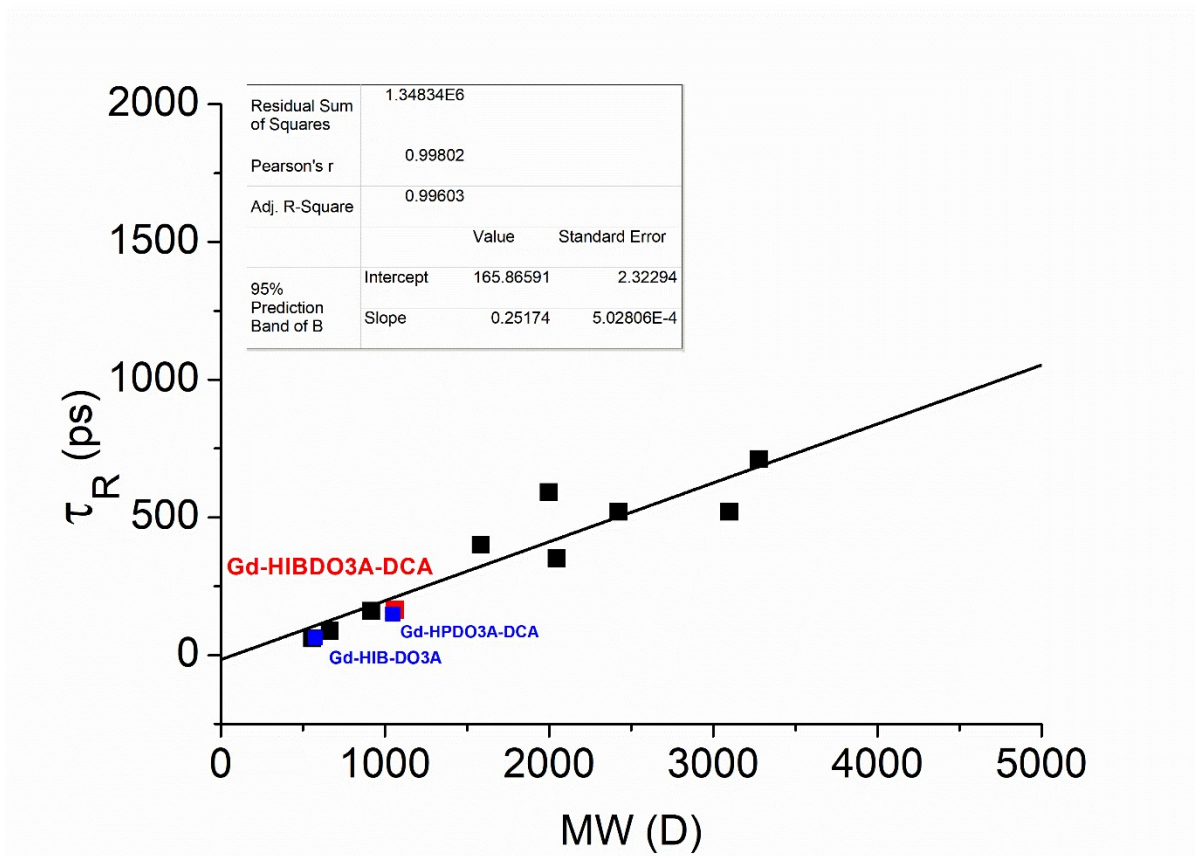

**Figure S14:** Linear dependence of the  $\tau_R$  values obtained from fitting the NMRD profiles reported in figure 6A and the molecular weight of the corresponding Gd-complexes. Data relative to Gd-HIBDO3A, Gd-HPDO3A-DCA and Gd-HIBDO3A-DCA are compared to those obtained for other  $q=1$  Gd-complexes reported in the literature.

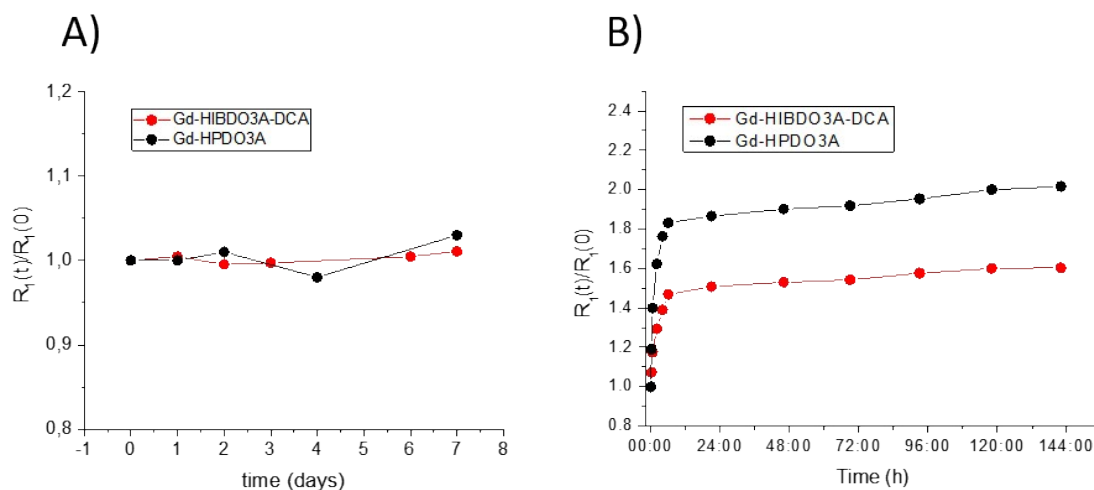

**Figure S15:** A) Transmetalation of Gd-complexes with 1 eq. Zinc in 50 mM phosphate buffer at 310 K and pH 7.4, measured at 0.47 T; B) Evaluation of inertness of Gd-complexes in 1 M HCl solution at 298K, measured at 0.47T.



room temperature.

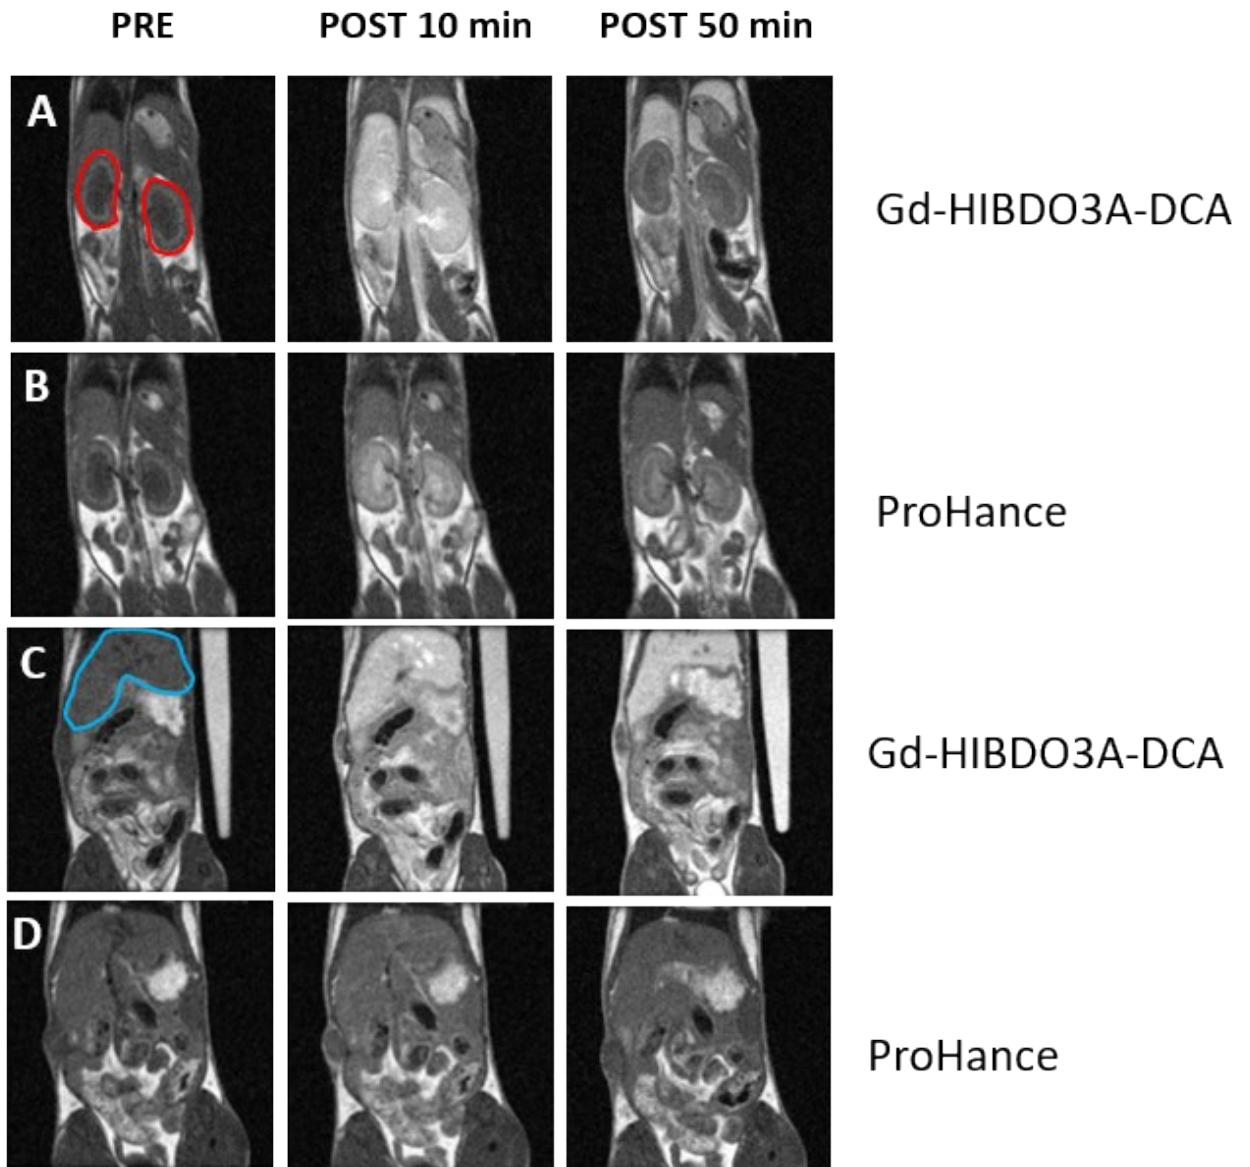

**Figure S16:** Representative T1-weighted MSME acquired at 1T for healthy tissues: kidneys (A, B – red line) and liver (C,D-blue line) obtained pre and after injection with Gd-HPDO3A (ProHance) and Gd-HIBDO3A-DCA. Images show left to right pre-contrast, and post-contrast at 10 and 50 min.

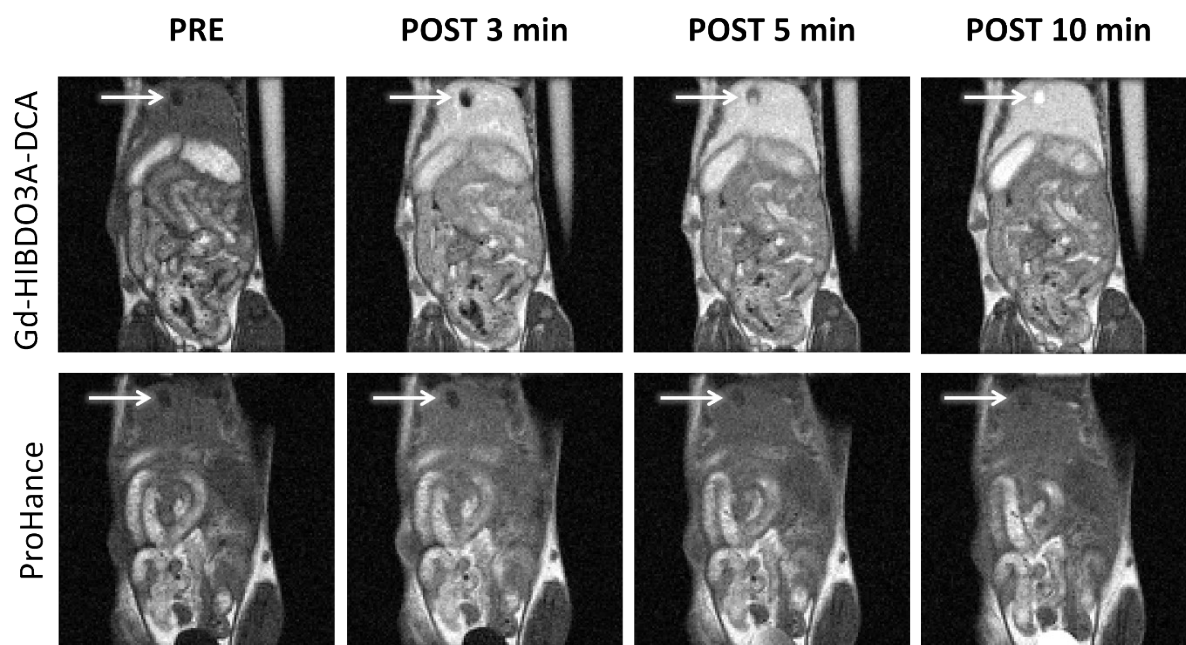

**Figure S17:** Representative T1-weighted MSME images acquired at 1T showing the enhancement of bile accumulated in the gallbladder (indicated by white arrows) obtained pre- and post-injection of Gd-HPDO3A (ProHance) and Gd-HIBDO3A-DCA. Images display, from left to right, pre-contrast and post-contrast at different time points.

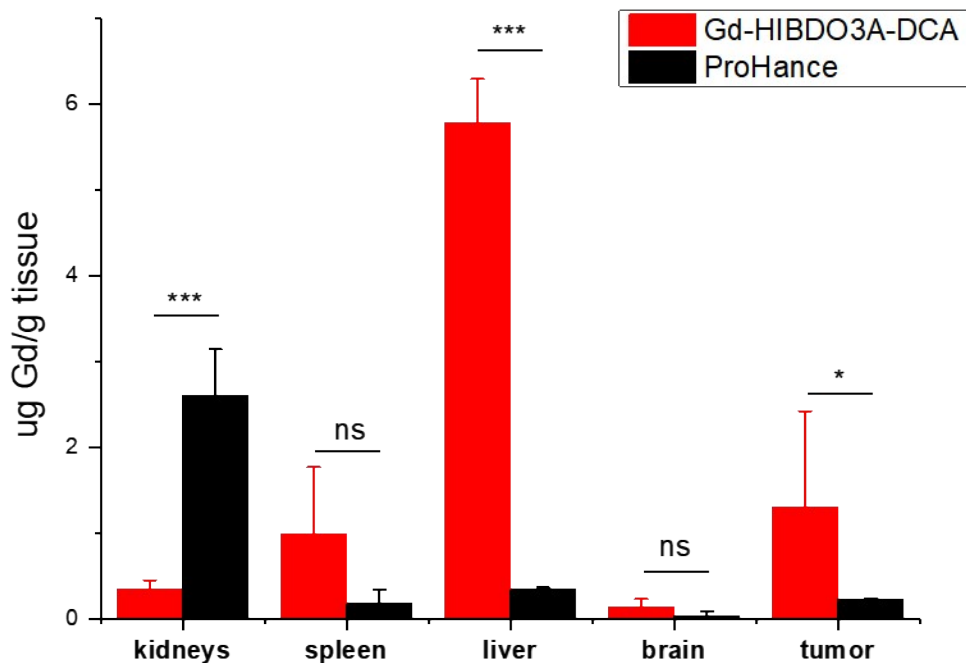

**Figure S18:** Biodistribution of Gd-HIBDO3A-DCA and ProHance in healthy BALB/c mice 4 hours after the administration of 0.05 mmol/Kg of contrast agent as determined by ICP-MS analysis. The Gd<sup>3+</sup> contents are presented as µg per gram of tissue and given as mean ± SD from 3 different mice.

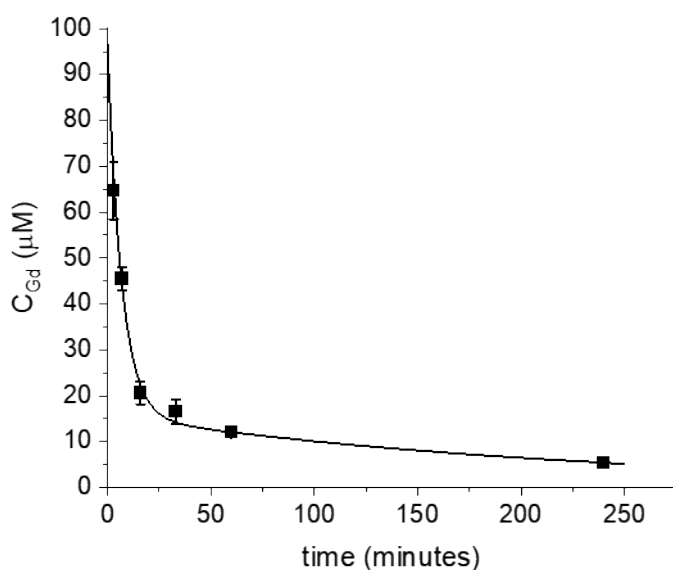

**Figure S19:** Blood elimination curve of Gd-HIBDO3A-DCA upon the intravenous administration of 0.05 mmol/kg of contrast agent in healthy mice. Data are reported as mean ± SD from 3 different mice.

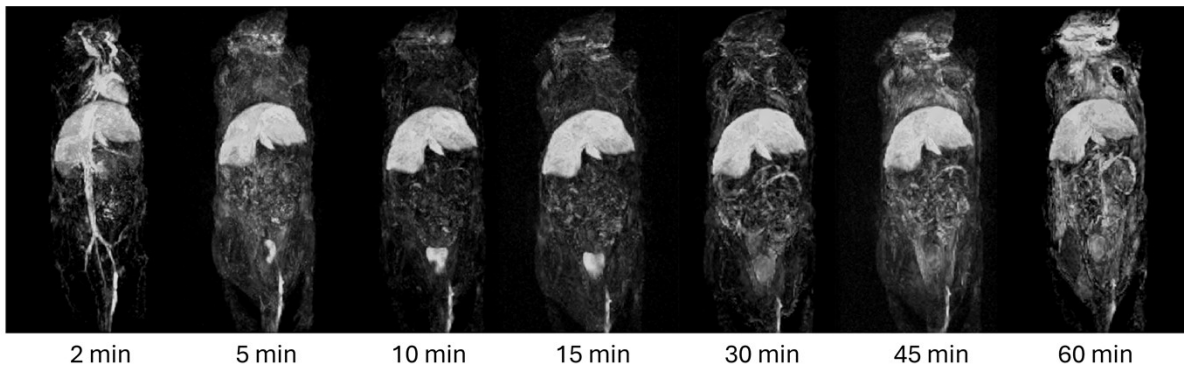

**Figure S20:** Whole-body coronal maximum intensity projection (MIP) of 3D FLASH images obtained following intravenous administration of Gd-HIBDO3A-DCA to a mouse at a dose of 0.05 mmol Gd/kg. Post-contrast images at 2, 5, 10, 15, 30, 45, and 60 minutes are presented here after subtraction of the corresponding pre-contrast images.
